# Supplementary material for: Molecular Pharmacology of Gelsemium Alkaloids on Inhibitory Receptors
Source: MDPI journal article supplement (doi:10.3390/ijms25063390), 2024-03-16
Supplement: s1 [file s1]

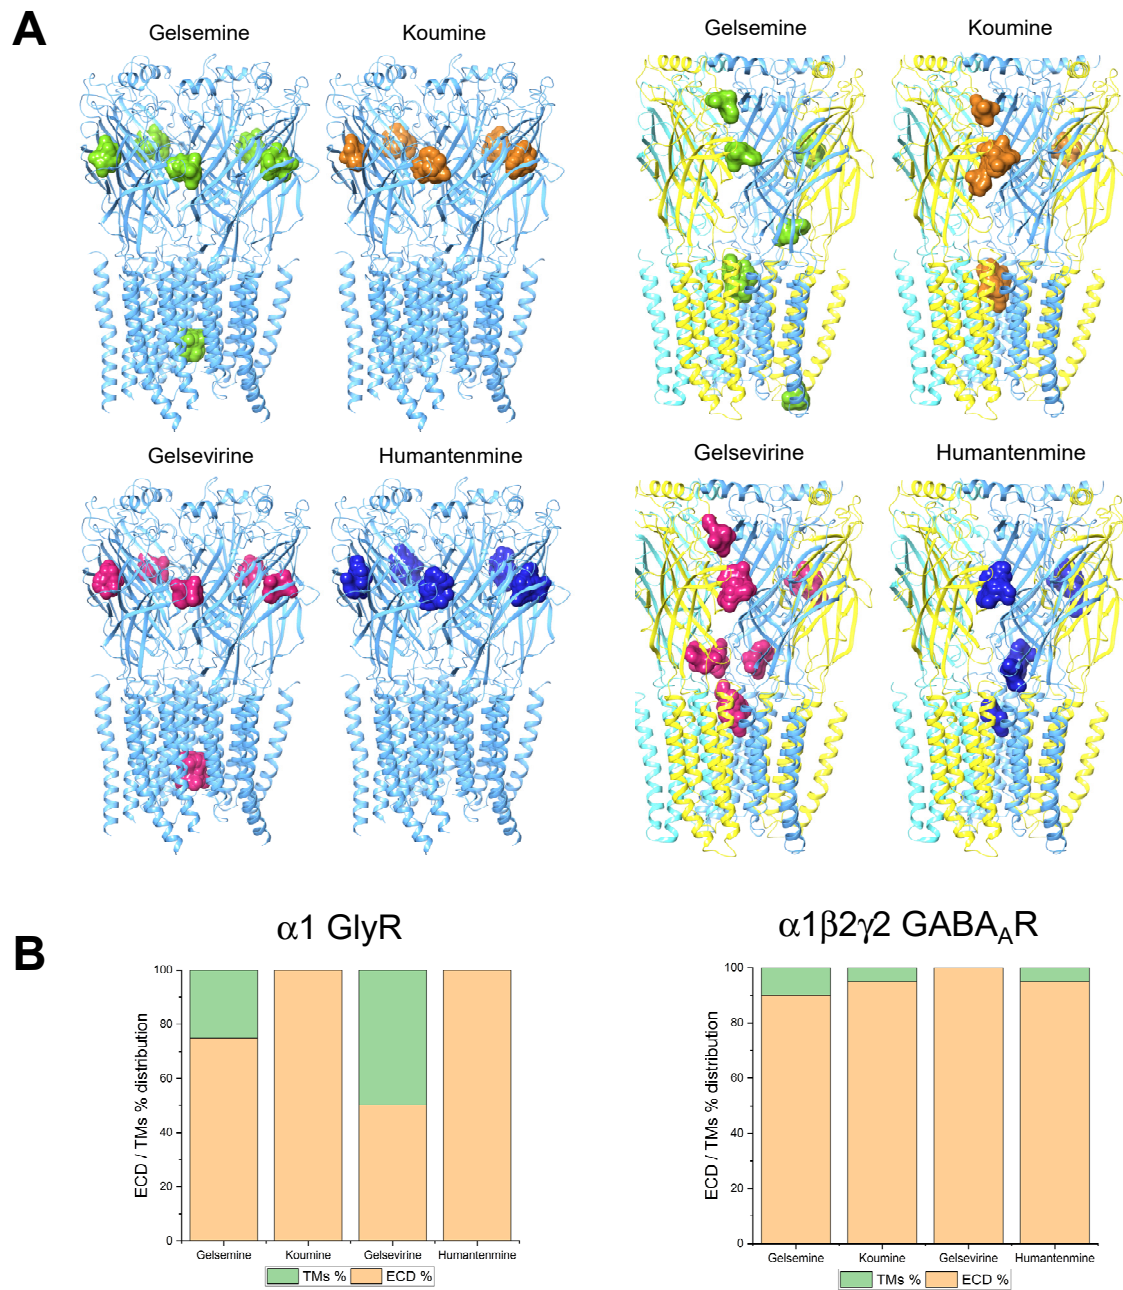

Supplementary Figure S1. Molecular sites for Gelsemium alkaloids on homomeric  $\alpha 1$ GlyRs and on  $\alpha 1\beta 2\gamma 2$  GABA<sub>A</sub>Rs. A. Structural models of the putative interactions of gelsemine (green),

koumine (orange), gelsevirine (pink), and humantenmine (blue) with GlyRs and GABA<sub>A</sub>Rs. The  $\alpha$ 1GlyR subunits are showed in blue. For GABA<sub>A</sub>Rs,  $\alpha$ 1 subunits are shown in yellow,  $\beta$ 2 subunits in cyan and  $\gamma$ 2 subunits in blue. B. The graph summarizes the percentage of alkaloid-receptor complexes formed in the extracellular domain (ECD) and in the transmembrane domains (TM). Structures of  $\alpha$ 1GlyRs (PDB:1TU9) and of  $\alpha$ 1 $\beta$ 2 $\gamma$ 2 GABA<sub>A</sub>Rs (PDB:6X3S) were used. The docking study was performed using Autodock Vina and GLIDE programs.

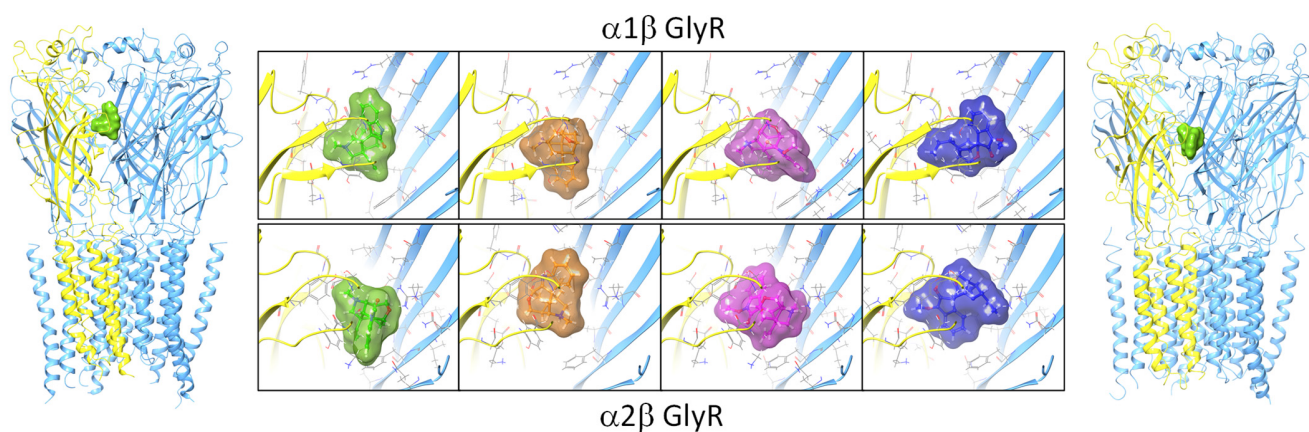

*Supplementary Figure S2. Putative binding of Gelsemium alkaloids to the  $\alpha$ - $\beta$  interphase of heteromeric GlyR subunits. The central panels describe the binding of gelsemine (green), koumine (orange), gelsevirine (magenta), and humantenmine (blue) to the  $\alpha$ - $\beta$  interphase of heteropentameric  $\alpha$ 1 $\beta$ GlyRs (upper panels) and  $\alpha$ 2 $\beta$ GlyRs (lower panels). The left ( $\alpha$ 1 $\beta$ ) and right ( $\alpha$ 2 $\beta$ ) models show and lateral view of the pentameric structures bound to gelsemine. The docking scores for the interaction of gelsemine, koumine, gelsevirine and humantenmine to the  $\alpha$ - $\beta$  interphase were similar to the orthosteric sites values ( $\alpha$ / $\alpha$  interphase).*

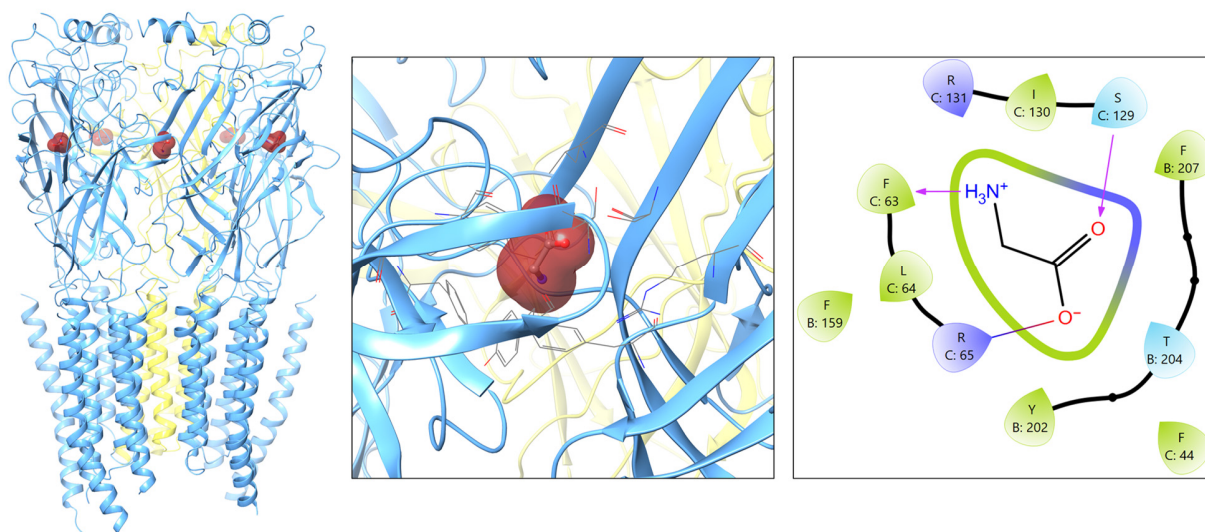

*Supplementary Figure S3. Interaction of glycine at the orthosteric site of the  $\alpha 1$  GlyR.* Utilizing a redocking strategy employing the open conformation structure of human GlyR  $\alpha 1\beta$  (PDB ID 8ND5), we have reconstructed the receptor-agonist complex. The left and center panels depict the localization of five glycine molecules bound to the orthosteric site, accompanied by respective zoomed images of an  $\alpha/\alpha$  interface, highlighting the side chains of amino acids within proximity of 4Å from the glycine. The right panel presents an interaction scheme detailing the amino acids and interactions responsible for stabilizing the glycine binding. Purple arrows denote hydrogen bonds, while the red-blue lines represent salt bridge interactions. Numbered residues are illustrated by colored markers, with the color code indicating amino acid properties (green for hydrophobic residues, blue for positively charged residues, and cyan for polar residues).
